# Supplementary material for: Identification of a Novel Prognostic Classifier for Platelet-related Genes Characteristics and Prognostic Significance of Aberrant Expression of PAFAH1B3 in Hepatocellular Carcinoma
Source: Research Square preprint supplement (doi:10.21203/rs.3.rs-910487/v1), 2021-09-22
Supplement: Supplementary file 1 [file b81086e86a0f286a5b7f4aab.xlsx]

## Sheet: IC50
Gene	Drug	cor	pvalue
PAFAH1B3	Cladribine	0.521753	2.2576e-05
SERPINE1	BLU-667	0.518548	2.58595e-05
SERPINE1	Simvastatin	0.485434	9.73967e-05
SERPINE1	Tamoxifen	-0.484787	9.98173e-05
SERPINE1	Staurosporine	0.4806	0.000116888
SERPINE1	dimethylfasudil	0.475587	0.000140827
SERPINE1	P-529	0.461383	0.000235138
SERPINE1	JNJ-3887618	0.45954	0.000250902
SERPINE1	Telatinib	0.458724	0.000258177
SERPINE1	XAV-939	0.457396	0.000270443
SERPINE1	By-Product of CUDC-305	-0.453431	0.000310296
SERPINE1	AMG-900	-0.445487	0.000406651
SERPINE1	Tanespimycin	-0.439641	0.000494127
SERPINE1	TAS-116	-0.437123	0.000536816
SERPINE1	Lenvatinib	0.432311	0.000627818
SERPINE1	SGX-523	0.423714	0.000825772
SERPINE1	IDH1-Comp 301	0.422977	0.000845121
SERPINE1	Nilotinib	-0.420139	0.000923501
SERPINE1	JNJ-38877605	0.41876	0.000963913
SERPINE1	IDH-C227	0.410715	0.00123308
SERPINE1	AT-13387	-0.405297	0.00145059
SERPINE1	Dasatinib	0.404415	0.00148907
SERPINE1	CUDC-305	-0.400164	0.00168776
SERPINE1	PKM2 (9)	0.390994	0.00219926
SERPINE1	Vorinostat	-0.390057	0.00225861
PAFAH1B3	CNDAC	0.389006	0.00232683
PAFAH1B3	Sapacitabine	0.381235	0.00289131
SERPINE1	Midostaurin	0.377187	0.00323113
SERPINE1	B-7100	-0.375122	0.00341774
SERPINE1	Alvespimycin	-0.374837	0.00344419
SERPINE1	Volasertib	-0.37477	0.00345044
SERPINE1	AS-703569	0.37018	0.00390355
SERPINE1	DOLASTATIN 10	-0.369721	0.00395163
SERPINE1	spebrutinib	0.368105	0.00412504
AP3B1	ZM-336372	0.367926	0.00414473
SERPINE1	Pazopanib	0.36524	0.00444925
SERPINE1	Momelotinib	0.3642	0.00457226
SERPINE1	Bleomycin	0.362245	0.00481186
SERPINE1	Rocilinostat	-0.357066	0.00550063
PAFAH1B3	Clofarabine	0.356497	0.00558142
SERPINE1	BGB-283	-0.355705	0.00569551
SERPINE1	R-306465	-0.355236	0.00576404
PAFAH1B3	Nelarabine	0.354665	0.00584845
SERPINE1	4SC-202	-0.350369	0.00651887
PAFAH1B3	Gemcitabine	0.350338	0.00652388
SERPINE1	SB-590885	-0.349778	0.00661613
SERPINE1	HYPOTHEMYCIN	-0.34891	0.00676146
SERPINE1	MPC-3100	-0.347988	0.00691866
SERPINE1	EMD-534085	-0.347106	0.00707218
SERPINE1	Belinostat	-0.346172	0.0072379
PAFAH1B3	tfdu	0.345015	0.00744797
PAFAH1B3	Asparaginase	0.342274	0.00796679
SERPINE1	SNX-5422	-0.341005	0.00821762
SERPINE1	ARQ-680	-0.339903	0.00844082
SERPINE1	ulixertinib	-0.33835	0.00876439
AP3B1	SAR-20347	0.337952	0.00884901
PAFAH1B3	Milciclib	-0.337029	0.00904803
SERPINE1	Bafetinib	-0.337009	0.0090524
SERPINE1	SB-202190	-0.335925	0.0092912
SERPINE1	VX-944	-0.334468	0.00962096
